22 9. Centre interdisciplinaire de recherche sur le cerveau et l'apprentissage,

23 Université de Montréal, Montréal, QC H3C 3J7, Canada

24 10. Département de chimie et Centre d'optique, photonique et laser (COPL),

25 Université Laval, Québec, QC G1V 0A6, Canada

26 *\*Co-first authors*

27 **Corresponding author:**

28 Mariana Baz, PhD

29 E-mail : [mariana.baz@crchudequebec.ulaval.ca](mailto:mariana.baz@crchudequebec.ulaval.ca)

30 Tel: 418-525-4444 ext 48281

31 Mathieu Thériault, PhD

32 E-mail : [mathieu.theriault@crchudequebec.ulaval.ca](mailto:mathieu.theriault@crchudequebec.ulaval.ca)

33 Tel: 418-525-4444 ext 47992

## 34 **ABSTRACT**

35 *Purpose:* Retail workers are an understudied occupational group that may have been at  
36 increased risk of contracting SARS-CoV-2 during the COVID-19 pandemic. Therefore, we  
37 set up a longitudinal cohort of participants working in this sector to better document the  
38 incidence of SARS-CoV-2 infection and the immune response to infection and/or  
39 vaccination in this group.

40 *Participants:* A total of 304 participants were recruited between April 20, 2021 and  
41 October 22, 2021. They were invited to attend three visits (each separated by ~12 weeks)  
42 during which they provided blood samples and information on participant characteristics,  
43 COVID-19 symptoms, and vaccination. An extension phase of two additional visits was  
44 carried out between March 15<sup>th</sup>, 2022 and October 3<sup>rd</sup>, 2022 to document the impact of  
45 the Omicron variant among the 198 participants who were still eligible for recruitment.  
46 Participants were aged 18 to 75 and worked in grocery stores, hardware stores, bars or  
47 restaurants within the Québec City metropolitan area (Canada). *Findings to date:* This  
48 article describes participants' demographic, socioeconomic, behavioral, clinical and  
49 occupational characteristics, and their COVID-19 symptoms (where applicable). It also  
50 describes SARS-CoV-2 vaccination status and any SARS-CoV-2 diagnostic test (i.e., PCR or  
51 rapid antigen) performed from the beginning of the pandemic until the last visit.

52 *Future plans:* The incidence of SARS-CoV-2 infections will be assessed. The immune  
53 response (innate and acquired) to SARS-CoV-2 infection or vaccination will be studied

54 using a variety of techniques, including reference and experimental enzyme-linked  
55 immunosorbent assays, microneutralization assays with live viruses, experimental  
56 pseudoneutralization with an angiotensin-converting enzyme 2-spike assay, peripheral  
57 blood mononuclear cells and neutrophil stimulation, and a proliferation assay based on  
58 carboxyfluorescein diacetate succinimidyl ester.

59 *Registration:* Not applicable.

60 *Strengths and limitations*

- 61 • This cohort offers a comprehensive dataset to study the immune response to  
62 SARS-CoV-2 infection or vaccination (alone), or hybrid immunity, as participants  
63 provided information on a wide range of demographic, socioeconomic,  
64 behavioral, clinical, and occupational variables. However, the low proportion of  
65 racial minorities (i.e., 3.0%) limits the use of this cohort to study racial  
66 determinants of immunity to SARS-CoV-2.
- 67 • This cohort focuses on workers in the food and retail service sector, an  
68 understudied population at high risk of occupational exposure to infectious  
69 agents.
- 70 • This study covered seven pandemic waves and thus captured a large number of  
71 confirmed infections from different variants.
- 72 • Sample collection was initiated immediately prior to COVID-19 vaccine availability  
73 for this population and thus captured successive vaccination campaigns over 17  
74 months.

- 75       • In keeping with the study design, none of the participants had severe COVID-19  
76       disease requiring hospitalization at baseline, and none of the COVID-19 illnesses  
77       that occurred during the study required hospitalization; this cohort may not,  
78       therefore, be used to study the immune response leading to severe health  
79       outcomes, but is appropriate to study the immune response to mild SARS-CoV-2  
80       infections.
- 81       • Nearly 1300 blood samples were collected; furthermore, only 13 out of 304 (4.3%)  
82       participants withdrew before attending all three initial visits, and 4 out of 198  
83       (2.0%) participants who remained eligible in the extension phase withdrew before  
84       attending the fifth visit. A series of at least 5 blood samples drawn over 48 weeks  
85       is therefore available for most participants.

## 86 INTRODUCTION

87 During the SARS-CoV-2 pandemic, workers with client-facing duties were considered  
88 to be at greater risk of infection than those who worked remotely.<sup>1-3</sup> Although most  
89 studies have focused on healthcare workers (HCW),<sup>4 5</sup> many non-HCWs were also  
90 considered to be at risk due to their occupational exposure.<sup>6 7</sup>

91 Workers in the food and retail industry are an understudied occupational group that  
92 may have been at greater risk of contracting SARS-CoV-2. These workers often have  
93 below-average incomes, face precarious employment conditions and lack benefit  
94 packages to cover health-related absenteeism. At the beginning of the pandemic, these  
95 workers often lacked the training and the access to protective equipment used by HCWs  
96 to reduce exposure.<sup>8</sup> However, risk is likely to vary from one sector to another. For  
97 example, grocery stores were considered an essential service and therefore remained  
98 open throughout the pandemic, with public health measures (e.g., mask wearing) being  
99 enforced and generally well respected. In contrast, restaurants and bars were  
100 intermittently opened and closed by health authorities over the same period, and public  
101 health measures were more difficult to enforce due to the intrinsically social nature of  
102 these businesses and their main purpose — the consumption of food and drink — that  
103 precluded continuous mask wearing.

104 Compelling evidence now confirms that the risk of occupational exposure is high for  
105 these workers. In a serological survey conducted in New York City prior to the approval of  
106 the first COVID-19 vaccine, the seroprevalence of anti-spike antibodies was higher among

107 grocery store and restaurant workers than in most subgroups of HCWs.<sup>1</sup> In another  
108 serosurvey conducted in Switzerland, kitchen staff and grocery store workers exhibited  
109 an above-average seroprevalence compared to other essential workers.<sup>9</sup> In the  
110 Netherlands, individuals working in the hospitality sector were more likely to have a  
111 positive PCR test result than those working in non-close-contact occupations.<sup>10</sup> In Japan,  
112 restaurants and bars were the second most common setting of SARS-CoV-2 outbreaks  
113 after healthcare facilities.<sup>7 11</sup>

114 To date, no thorough investigation of SARS-CoV-2 exposure has been conducted  
115 among Canadian workers in grocery stores, hardware stores, bars or restaurants.<sup>12 13</sup> Such  
116 an investigation could help better prepare health authorities when implementing future  
117 measures, including the designation of priority groups for vaccination, and mandatory  
118 lockdowns in these sectors. Accordingly, we set up a longitudinal cohort that investigated  
119 the incidence of COVID-19 and the humoral and cellular immunity (innate and acquired)  
120 to SARS-CoV-2 in these workers. This article describes the experimental design of the  
121 project and the cohort of participants.

## 122 **COHORT DESCRIPTION**

### 123 *Participants and setting*

124 Eligibility criteria included the following: (1) providing informed consent; (2) age  $\geq 18$   
125 years; (3) working either on a full-time or part-time basis in a grocery store, hardware  
126 store, bar or restaurant located in the administrative regions of Capitale-Nationale and  
127 Chaudière-Appalaches that include and surround the area of Québec City, Canada; (4)  
128 having a public-facing role in daily work-related activities; (5) having worked  $\geq 20$  full days  
129 between February 1<sup>st</sup>, 2020 and the first visit; and (6) having no history of hospitalization  
130 due to COVID-19.

131 Participants were recruited using a variety of strategies: 1) an online recruitment  
132 campaign conducted by a student-run communication agency; 2) email invitations to  
133 members of partner union organizations - *Confédération des syndicats nationaux* (CSN)  
134 and to sectoral organizations of hardware store workers - *Association Québécoise de la*  
135 *quincaillerie et des matériaux de construction* (AQMAT); and 3) email information to all  
136 students and employees at *Université Laval* and the *Centre Hospitalier Universitaire de*  
137 *Québec* in order to publicize the study.

### 138 *Design and procedures*

139 The study was initially designed as a prospective cohort study with three sampling  
140 visits, each separated by  $12 \pm 2$  weeks, between April 20<sup>th</sup>, 2021 and October 3<sup>rd</sup>, 2022. In  
141 response to the emergence of Omicron, an extension of two additional visits was  
142 proposed to the participants who were still eligible for recruitment. An additional COVID-



143 19 visit (VCoV) was also planned shortly after the occurrence of any SARS-CoV-2 infection  
144 during the study period (Figure 1).

145 At the first visit (“V1”), participants signed an informed consent form and were then  
146 interviewed by trained nurses to obtain information on demographic, socioeconomic,  
147 behavioral, clinical and occupational variables (Table 1). The questionnaires were adapted  
148 from those suggested by our funding body, the COVID Immunity Task Force (CITF).<sup>14</sup> At or  
149 after the third visit (“V3”), eligible participants received information about the extension  
150 of the study and signed a new informed consent if they were interested in participating.

151 At the second (“V2”), third (“V3”), fourth (“V4”) and fifth visits (“V5”), participants  
152 completed an abridged version of the V1 questionnaire that focused the COVID-19  
153 vaccines that they received and SARS-CoV-2 symptoms, diagnosis, exposure and  
154 associated risk factors (Table 1). Blood was drawn to study humoral immunity (i.e., at V1  
155 to V5) and cellular immunity (i.e., at V1, V3, and V5) to SARS-CoV-2. Additional PCR tests  
156 were carried out at V4 and V5 to detect asymptomatic carriers.

157 The VCoV visits took place at a median time of 15 days (10 to 42 days) after the onset  
158 of symptoms. Blood was drawn to study humoral and cellular immunity and a  
159 questionnaire focusing exclusively on SARS-CoV-2 diagnosis and symptoms was  
160 completed at that visit.

### 161 *Study exposures and follow-up*

162 The two main exposures of the study were SARS-CoV-2 infection, defined as a  
163 positive test result for SARS-CoV-2 (PCR or antigen detection), and participants’

164 vaccination status. Participants were asked about possible or confirmed SARS-CoV-2  
165 infection (i.e., symptoms, diagnostic test, test date and test result) and their SARS-CoV-2  
166 vaccination history (i.e., number of doses, date of vaccination, type of vaccine) since the  
167 beginning of the pandemic at V1, and since the last visit (at V2 to V5). Positive SARS-CoV-  
168 2 test results were therefore captured from the beginning of the pandemic until the  
169 earliest among the last visit, withdrawal from the study, or loss of eligibility.

#### 170 *Study outcome*

171 The primary outcomes were vaccine- and infection-induced immunity. We also  
172 explored the humoral immunity, using different techniques and antigens, and the cellular  
173 immunity (innate and acquired).

#### 174 *Confidentiality and data storage*

175 This study was approved by the « *Comité d'éthique de la recherche du CHU de Québec*  
176 – *Université Laval* » (registration number 2021-5744). A unique, anonymized identifier  
177 was assigned to each participant and used to store the data and the samples. The samples  
178 will be stored for up to 10 years, and the data for at least 15 years.

#### 179 *Patient and public involvement statement*

180 No public stakeholders were involved in establishing and designing this cohort.

#### 181 *Participant characteristics*

182 Overall, 304 individuals were initially recruited to attend the three first visits from  
183 April 20<sup>th</sup>, 2021 to May 9<sup>th</sup>, 2022. The cohort included 149 (49.0%) restaurant/bar

184 workers, 112 (36.8%) grocery store workers, and 43 (14.1%) hardware store workers.  
185 With the emergence of Omicron, 198 participants who at the time of ethic approval were  
186 still within the recruiting window, were included for two additional visits (12±4 weeks  
187 apart) between March 15<sup>th</sup>, 2022 and October 3<sup>rd</sup>, 2022. Only 13 out of 304 (4.3%)  
188 withdrew before V3, and only 4 more out of 198 (2.0%) withdrew at V5, resulting in a  
189 series of at least 5 blood samples drawn over 48 weeks for most participants.

190 On average, participants were aged 41.3 years in the overall cohort (Table 2).  
191 Specifically, restaurants/bar workers were on average 37.2 years old, grocery store  
192 workers 44.2 and hardware store workers 48.2. Female participants represented 57.9%  
193 of the cohort. Overall, 96.7% self-identified as White, 1.6% as Asian, 1.0% as Latino  
194 American, and 0.7% as Black. The low proportion of racial minorities (i.e., 3.3%) is  
195 consistent with the size of the visible minority population in the Québec City metropolitan  
196 area (i.e., 4.9% according to census).<sup>15</sup> Levels of education varied: 39.4% reported having  
197 a high school diploma or vocational certificate, 33.2% a higher education certificate and  
198 22.7% at least a university degree. In total, 76.0% of participants resided in the Capitale-  
199 Nationale administrative region, the remainder residing in the Chaudière-Appalaches  
200 administrative region (Table 3). Most (i.e., 62.2%) lived alone or with one other person,  
201 23.0% lived with children (<18 years), 15.5% with HCWs and 7.6% with teachers or  
202 kindergarten workers. These distributions were similar within each occupational group.

203 According to body mass index (BMI), 41.1% of the participants had a healthy weight  
204 (i.e., BMI=18.5 to 24.9 kg/m<sup>2</sup>), 27.0% were overweight (BMI=25.0 to 29.9 kg/m<sup>2</sup>) and

205 30.6% were obese (BMI  $\geq 30$  kg/m<sup>2</sup>) (Table 4). Only 1.3% were considered underweight  
206 (BMI <18.5 kg/m<sup>2</sup>). Cigarette (i.e., tobacco) use was reported by 17.4% of the participants  
207 and e-cigarette use by 7.9%. About half (i.e., 47.7%) of participants reported having at  
208 least one comorbidity. Hardware store workers had more comorbidities, probably  
209 because they were slightly older (on average). Overall, 17.1% reported usually receiving  
210 an annual influenza vaccine (13.8% in the year prior to the first visit).

211 Approximately half (i.e., 53.6%) of the participants reported working on average  
212 more than 30 hours per week (Table 5). Most (88.8%) had attended at least one gathering  
213 of 10 or more persons during the study period, and 40.8% reported attending more than  
214 10 such gatherings. The predominant mode of transportation was by car (88%), followed  
215 by bus (12.8%) and walking (9.2%). Traveling outside the province of Québec was reported  
216 by 47.0% of the participants, with 25.7% travelling within Canada, 14.8% to the United  
217 States, and 27.6% elsewhere. The distribution of participants in each occupational group  
218 was similar for the workplace region, mode of transportation and travelling, but differed  
219 for the weekly hours worked and the number of gatherings attended.

220 Overall, 98.7% of the participants reported wearing a mask at work, indicating  
221 excellent adherence to this measure (Table 6). Other measures, such as handwashing  
222 (98.4%), distancing (70.1%) and the use of Plexiglas dividers (77.3%) were also frequent.  
223 The use of gloves (6.9%) and face-shields (10.5%), which were not extensively promoted  
224 by the regional public health authorities, were less frequent. Outside work, all  
225 participants reported wearing a mask in public (100.0%); most avoided usual salutations

226 (85.2%), practiced social distancing (84.2%) and avoided contact with vulnerable persons  
227 (83.6%) and crowded places (76.6%). Most participants reported washing their hands  
228 when dirty (96.7%), after using the bathroom (97.7%), when arriving at (92.1%) and  
229 leaving the workplace (71.7%), before eating (87.8%) and after handling trash (79.6%). In  
230 general, adherence to these measures was consistently lower among restaurant and bar  
231 workers, possibly because of the nature of their work or their younger age (on average).

## 232 **FINDINGS TO DATE**

### 233 *SARS-CoV-2 infection*

234 Overall, 168 positive tests were reported in 121 participants throughout the study  
235 period (Table 7). Of these tests, 117 were the first to yield a positive result as reported by  
236 the participants; 40 (performed by 37 participants) were additional tests with 32  
237 considered follow-up tests (<90 days since previous test) and 8 detecting a second or third  
238 infection (>90 days since previous test). The remaining 11 (including four first-ever  
239 positives) were PCR tests performed as per protocol at V4 and V5 among asymptomatic  
240 or pre-symptomatic individuals. In addition, 29 participants reported 31 suspected  
241 COVID-19 infections based on their symptoms, although not confirmed by a PCR or  
242 antigen detection test.

### 243 *SARS-CoV-2-related symptoms*

244 Among the 117 participants with a first confirmed SARS-CoV-2 infection, 94.9%  
245 reported  $\geq 1$  symptom at the time of testing (Table 8). Each individual symptom was  
246 experienced by  $\geq 47.9\%$  of participants, except for diarrhea (13.7%) and loss of smell or

247 taste (22.2%), a pattern consistent with prior studies.<sup>16-18</sup> These distributions were similar  
248 within each occupational group.

249 Vaccination for SARS-CoV-2

250 The participants were vaccinated according to local government recommendations  
251 with the vaccines approved by Canadian health authorities. The COVID-19 vaccines  
252 available were monovalent Comirnaty (Pfizer-BioNTech), Spikevax (Moderna) and  
253 Vaxzevria (AstraZeneca), which each required two doses to complete the primary series.  
254 Hardware store workers were the most highly vaccinated occupational group, 100% of  
255 them having received two doses by February 2022 (Figure 2). By the end of the study (i.e.,  
256 last visit between May 10<sup>th</sup>, 2022 and October 3<sup>rd</sup>, 2022), nearly 70% of all participants  
257 had received at least one booster dose.

258 At the time of testing positive, 17.9% of the participants had received no vaccine  
259 dose, 0.9% had received a single dose of vaccine, 38.4% had received two, 39.3% had  
260 received three, and 3.4% had received four (Table 9). In participants who tested positive  
261 and had received at least two vaccine doses, all infections occurred after the 4<sup>th</sup> wave,  
262 when the Omicron variant was predominant.

263 *Blood sample bank to study infection-induced, vaccine-induced, and hybrid immunity*

264 Overall, 1299 blood samples were collected, including 304 (23.4%) at V1, 297 (22.9%)  
265 at V2, 291 (22.4%) at V3, 198 (15.2%) at V4, 194 (15.0%) at V5, and 15 (1.2%) at additional  
266 visits (i.e., VCoV). In total, 69.2% of the blood samples were drawn from vaccinated  
267 participants with no known history of SARS-CoV-2 infection, 23.1% from vaccinated and

268 previously infected participants, 6.9% from unvaccinated participants with no known  
269 history of SARS-CoV-2 infection, and 11 (0.8%) from previously infected and unvaccinated  
270 participants (Table 10).

## 271 **STRENGTHS AND LIMITATIONS**

272 We set up a cohort of 304 participants to conduct a longitudinal study of COVID-19  
273 immunity among food and retail workers who lived and worked within the greater  
274 Québec City metropolitan region. The participants provided information on a wide range  
275 of demographic, socioeconomic, behavioral, clinical and occupational variables. The study  
276 covered seven waves of COVID-19 infection, including those dominated by the Alpha,  
277 Delta, and Omicron variants, thus capturing a relatively large number of epidemiological  
278 periods and infections. In addition, the blood samples were collected at each scheduled  
279 visit regardless of participants' infection or vaccination history, thus enabling the study of  
280 infection-induced, vaccine-induced and hybrid immunity in this extensively characterized  
281 cohort. Moreover, few participants withdrew from the study before the end of the initial  
282 (i.e., V1-V3) and extension phases (i.e., V4-V5), resulting in complete series of at least 5  
283 samples for most participants.

284 A total of 117 first (ever) COVID-19 infections were reported, and most occurred  
285 between December 5<sup>th</sup>, 2021 and October 3<sup>rd</sup>, 2022, consistent with the emergence of  
286 the highly contagious Omicron variant. In the present study, vaccine coverage was high:  
287 by the time Omicron had emerged, nearly 95% of the participants had already received  
288 two vaccine doses (primary series). This high rate of vaccination may be because retail

289 workers considered themselves at higher risk of SARS-CoV-2 exposure than the general  
290 population and were thus more willing to get vaccinated and reduce their risk of infection.

291 Some limitations must be considered when interpreting our results. Per the study  
292 design, none of the participants had previously experienced a severe COVID-19 illness  
293 that required hospitalization. Therefore, the cohort may not be used to study the immune  
294 response that leads to severe health outcomes, but is appropriate to study the immune  
295 response to mild COVID-19 illness. Furthermore, our study was not designed to infer a  
296 causal relationship between a worker's occupational sector and the risk of SARS-CoV-2  
297 infection, such that confounders probably explain part of the differences among  
298 occupational groups. For example, relative to hardware store workers, grocery store  
299 workers were younger (i.e., mean age: 44.2 vs. 48.2 years), included more overweight or  
300 obese participants (i.e., 72.3% vs. 46.5%), and lived in more crowded households (i.e.,  
301 proportion with  $\geq 3$  residents: 49.1% vs. 25.6%), which may have predisposed them to  
302 infection. Another limitation is that the cohort may have been subject to a sampling bias  
303 as there may be less vaccine hesitancy among people willing to participate in a scientific  
304 study. Hence, the study participants may not be representative of the overall population  
305 of workers in these sectors. This is suggested by the 5% to 7% higher vaccination coverage  
306 for the second dose as of fall 2021 compared to the general population of the province of  
307 Québec.

308 The low proportion of racial minorities (i.e., 3.0%) also limits the use of this cohort to  
309 study racial determinants of immunity to SARS-CoV-2. In addition, participant responses



310 may have been affected by a memory bias, particularly for those whose last infection  
311 occurred months before V1. Moreover, few samples were drawn from unvaccinated and  
312 previously infected participants, so that the cohort may be of limited use to study  
313 immunity induced by infection alone. The high vaccination coverage also made it  
314 impossible to assess the impact of vaccination on the risk of infection, since, at any given  
315 time, most participants had been vaccinated. Lastly, our study may have underestimated  
316 the incidence of SARS-CoV-2 infection since most infections occurred during the Omicron  
317 wave, when access to PCR-based screening was limited in Québec (and only less sensitive  
318 antigen detection tests were available). The serology data of these samples will shed light  
319 on this question.

## 320 **COLLABORATION**

321 More detailed, participant-level information is publicly available on an online platform  
322 developed by Maelstrom Research.<sup>19</sup> Researchers with other enquiries or collaboration  
323 proposals may contact Sylvie Trottier — the principal investigator in charge of setting up  
324 the cohort — at [sylvie.trottier@crchudequebec.ulaval.ca](mailto:sylvie.trottier@crchudequebec.ulaval.ca). Data on participants' immune  
325 responses to SARS-CoV-2 infection and vaccination will be shared through peer-reviewed  
326 publications.

327 **Funding:** This project is being supported by funding from the Public Health Agency of  
328 Canada, through the Vaccine Surveillance Reference group and the COVID-19 Immunity  
329 Task Force (grant number: 2021-HQ-000134).

330 **Competing interests statement:** Nothing to declare.

331 **Data sharing statement:** All participant-level information is publicly available on an online  
332 platform developed by Maelstrom Research.

333 **Author contributions:** The co-principal investigators of the study were DB and ST, who  
334 conceived the study and led the proposal. Protocol design and development team: J.N.P.,  
335 C.G., J.-F.M., M.B., D.B., and S.T. K.S. constructed the data base, coordinated the study  
336 and contributed to the data analysis. M.T. did the maintenance and the development of  
337 the data base, the cleaning of the data and contributed to data analysis. N.B. oversaw  
338 the data analysis. S.R. participated to data analysis and wrote the first draft of the  
339 manuscript. All authors critically reviewed and approved the final manuscript.

340 **Acknowledgements:** The authors thank the participants and all the staff involved in  
341 planning and preparation of this study. David Simonyan helped with statistical analysis. A  
342 special thank you to our partners: CSN Federation of Commerce and AQMAT.

343 **ORCID iDs**

344 Sylvie Trottier <https://orcid.org/0000-0002-3986-5146>

345 Denis Boudreau <https://orcid.org/0000-0001-5152-2464>

346 Caroline Gilbert <https://orcid.org/0000-0003-2722-1180>

347 Jean-Francois Masson <https://orcid.org/0000-0002-0101-0468>

348 Mariana Baz <https://orcid.org/0000-0002-1230-0735>

349 Joelle Pelletier <https://orcid.org/0000-0002-2934-6940>

350 Mathieu Thériault <https://orcid.org/0000-0002-7293-7623>

## 351 REFERENCES

- 352 1. Pathela P, Crawley A, Weiss D, et al. Seroprevalence of Severe Acute Respiratory  
353 Syndrome Coronavirus 2 Following the Largest Initial Epidemic Wave in the  
354 United States: Findings From New York City, 13 May to 21 July 2020. *J Infect Dis*  
355 2021;224(2):196-206. doi: 10.1093/infdis/jiab200
- 356 2. Feehan AK, Velasco C, Fort D, et al. Racial and Workplace Disparities in  
357 Seroprevalence of SARS-CoV-2, Baton Rouge, Louisiana, USA. *Emerg Infect Dis*  
358 2021;27(1) doi: 10.3201/eid2701.203808 [published Online First: 20201110]
- 359 3. Sim MR. The COVID-19 pandemic: major risks to healthcare and other workers on the  
360 front line. *Occup Environ Med* 2020;77(5):281-82. doi: 10.1136/oemed-2020-  
361 106567 [published Online First: 20200401]
- 362 4. Gomez-Ochoa SA, Franco OH, Rojas LZ, et al. COVID-19 in Health-Care Workers: A  
363 Living Systematic Review and Meta-Analysis of Prevalence, Risk Factors, Clinical  
364 Characteristics, and Outcomes. *Am J Epidemiol* 2021;190(1):161-75. doi:  
365 10.1093/aje/kwaa191
- 366 5. Gholami M, Fawad I, Shadan S, et al. COVID-19 and healthcare workers: A systematic  
367 review and meta-analysis. *Int J Infect Dis* 2021;104:335-46. doi:  
368 10.1016/j.ijid.2021.01.013 [published Online First: 20210111]
- 369 6. Boucher E, Cao C, D'Mello S, et al. Occupation and SARS-CoV-2 seroprevalence  
370 studies: a systematic review. *BMJ Open* 2023;13(2):e063771. doi:  
371 10.1136/bmjopen-2022-063771 [published Online First: 20230228]
- 372 7. Vachon MS, Demmer RT, Yendell S, et al. SARS-CoV-2 Seroprevalence Survey in  
373 Grocery Store Workers-Minnesota, 2020-2021. *Int J Environ Res Public Health*  
374 2022;19(6) doi: 10.3390/ijerph19063501 [published Online First: 20220316]
- 375 8. Parks CA, Nugent NB, Fleischhacker SE, et al. Food System Workers are the  
376 Unexpected but Under Protected COVID Heroes. *J Nutr* 2020;150(8):2006-08. doi:  
377 10.1093/jn/nxaa173
- 378 9. Stringhini S, Zaballa ME, Pullen N, et al. Large variation in anti-SARS-CoV-2 antibody  
379 prevalence among essential workers in Geneva, Switzerland. *Nat Commun*  
380 2021;12(1):3455. doi: 10.1038/s41467-021-23796-4 [published Online First:  
381 20210608]
- 382 10. de Gier B, de Oliveira Bressane Lima P, van Gaalen RD, et al. Occupation- and age-  
383 associated risk of SARS-CoV-2 test positivity, the Netherlands, June to October  
384 2020. *Euro Surveill* 2020;25(50) doi: 10.2807/1560-7917.ES.2020.25.50.2001884
- 385 11. Furuse Y, Sando E, Tsuchiya N, et al. Clusters of Coronavirus Disease in Communities,  
386 Japan, January-April 2020. *Emerg Infect Dis* 2020;26(9) doi:  
387 10.3201/eid2609.202272 [published Online First: 20200610]
- 388 12. Decarie Y, Michaud PC. Counting the Dead: COVID-19 and Mortality in Quebec and  
389 British Columbia During the First Wave. *Can Stud Popul* 2021;48(2-3):139-64.  
390 doi: 10.1007/s42650-021-00053-z [published Online First: 20210917]
- 391 13. Shim E. Regional Variability in COVID-19 Case Fatality Rate in Canada, February-  
392 December 2020. *Int J Environ Res Public Health* 2021;18(4) doi:  
393 10.3390/ijerph18041839 [published Online First: 20210214]

- 394 14. COVID-19 Immunity Task Force standardized core survey data elements [Available  
395 from: [https://www.covid19immunitytaskforce.ca/covid-19-immunity-task-force-](https://www.covid19immunitytaskforce.ca/covid-19-immunity-task-force-releases-standardized-core-survey-data-elements/)  
396 [releases-standardized-core-survey-data-elements/](https://www.covid19immunitytaskforce.ca/covid-19-immunity-task-force-releases-standardized-core-survey-data-elements/) accessed February 15th, 2023  
397 2023.
- 398 15. Census profile, 2016 census, Québec City [Available from:  
399 [https://www12.statcan.gc.ca/census-recensement/2016/dp-](https://www12.statcan.gc.ca/census-recensement/2016/dp-pd/prof/details/page.cfm?Lang=E&Geo1=CSD&Code1=2423027&Geo2=CD&Code2=2423&Data=Count&SearchText=quebec&SearchType=Begins&SearchPR=01&B1=All&TABID=1)  
400 [pd/prof/details/page.cfm?Lang=E&Geo1=CSD&Code1=2423027&Geo2=CD&C](https://www12.statcan.gc.ca/census-recensement/2016/dp-pd/prof/details/page.cfm?Lang=E&Geo1=CSD&Code1=2423027&Geo2=CD&Code2=2423&Data=Count&SearchText=quebec&SearchType=Begins&SearchPR=01&B1=All&TABID=1)  
401 [ode2=2423&Data=Count&SearchText=quebec&SearchType=Begins&SearchPR](https://www12.statcan.gc.ca/census-recensement/2016/dp-pd/prof/details/page.cfm?Lang=E&Geo1=CSD&Code1=2423027&Geo2=CD&Code2=2423&Data=Count&SearchText=quebec&SearchType=Begins&SearchPR=01&B1=All&TABID=1)  
402 [=01&B1=All&TABID=1](https://www12.statcan.gc.ca/census-recensement/2016/dp-pd/prof/details/page.cfm?Lang=E&Geo1=CSD&Code1=2423027&Geo2=CD&Code2=2423&Data=Count&SearchText=quebec&SearchType=Begins&SearchPR=01&B1=All&TABID=1) accessed February 16th, 2023.
- 403 16. Zhu J, Ji P, Pang J, et al. Clinical characteristics of 3062 COVID-19 patients: A meta-  
404 analysis. *J Med Virol* 2020;92(10):1902-14. doi: 10.1002/jmv.25884 [published  
405 Online First: 20200624]
- 406 17. Burke RM, Killerby ME, Newton S, et al. Symptom Profiles of a Convenience Sample  
407 of Patients with COVID-19 - United States, January-April 2020. *MMWR Morb*  
408 *Mortal Wkly Rep* 2020;69(28):904-08. doi: 10.15585/mmwr.mm6928a2 [published  
409 Online First: 20200717]
- 410 18. Government C. COVID-19 signs, symptoms and severity of disease: A clinician guide.  
411 [Available from: [https://www.canada.ca/en/public-health/services/diseases/2019-](https://www.canada.ca/en/public-health/services/diseases/2019-novel-coronavirus-infection/guidance-documents/signs-symptoms-severity.html)  
412 [novel-coronavirus-infection/guidance-documents/signs-symptoms-severity.html](https://www.canada.ca/en/public-health/services/diseases/2019-novel-coronavirus-infection/guidance-documents/signs-symptoms-severity.html).
- 413 19. Boudreau DT, Sylvie; Masson, Jean-François; Baz Etchebarne, Mariana; Gilbert,  
414 Caroline; Pelletier, Joëlle;. CISACOV investigators. Cellular Immunity and  
415 Seroprevalence of Antibodies against SARS-CoV-2: Characterisation of Three  
416 Populations of Food Workers. , 2021-2022.
- 417 20. Canada Go. COVID-19 vaccination in Canada: Government of Canada; 2023 [updated  
418 2023-03-03. Available from: [https://health-infobase.canada.ca/covid-](https://health-infobase.canada.ca/covid-19/vaccination-coverage/)  
419 [19/vaccination-coverage/](https://health-infobase.canada.ca/covid-19/vaccination-coverage/).

420

421 **TABLES AND FIGURES**

422 **Table 1. Participant visits**

|                                         | Visit 1<br>N=304 | Visit 2<br>N=297 | Visit<br>N=291 | Visit 4<br>N=198 | Visit 5<br>N=194 | COVID-19<br>visit (VCoV)<br>N=15 |
|-----------------------------------------|------------------|------------------|----------------|------------------|------------------|----------------------------------|
| <b>Retention</b>                        | 100%             | 98%              | 96%            | 100%             | 98%              | -                                |
| <b>Eligibility assessment</b>           | X                |                  |                | X                |                  |                                  |
| <b>Consent form</b>                     | X                |                  |                | X                |                  |                                  |
| <b>Participant characteristics</b>      |                  |                  |                |                  |                  |                                  |
| Demographic data                        | X                |                  |                |                  |                  |                                  |
| Household data                          | X                |                  |                |                  |                  |                                  |
| Clinical data                           | X                |                  |                |                  |                  |                                  |
| Occupational data                       | X                | X                | X              | X                | X                | X                                |
| <b>Retrospective questionnaire form</b> |                  |                  |                |                  |                  |                                  |
| COVID-19 positive tests & symptoms      | X                | X                | X              | X                | X                | X                                |
| Vaccine status                          | X                | X                | X              | X                | X                | X                                |
| <b>Cross-section interventions</b>      |                  |                  |                |                  |                  |                                  |
| Humoral immunity blood samples          | X                | X                | X              | X                | X                | X                                |
| Cellular immunity blood samples         | X                |                  | X              |                  | X                | X                                |
| COVID-19 PCR test at visit              |                  |                  |                | X                | X                |                                  |

423

424 **Table 2. Detailed demographics of study participants at the first visit**

|                                          | Overall study population |                               | Restaurant/bar workers |                              | Grocery store workers |                              | Hardware store workers |                              |
|------------------------------------------|--------------------------|-------------------------------|------------------------|------------------------------|-----------------------|------------------------------|------------------------|------------------------------|
|                                          | Total (N=304)            | COVID-19 <sup>1</sup> (N=117) | Total (N=149)          | COVID-19 <sup>1</sup> (N=62) | Total (N=112)         | COVID-19 <sup>1</sup> (N=42) | Total (N=43)           | COVID-19 <sup>1</sup> (N=13) |
| <b>Age (years), Mean±SD</b>              | 41.3 ± 15.9              | 39.6 ± 14.6                   | 37.2 ± 14.8            | 36.2 ± 14.3                  | 44.2 ± 15.3           | 42.4 ± 14.1                  | 48.2 ± 17.3            | 46.5 ± 14.6                  |
| Age groups, N (%)                        |                          |                               |                        |                              |                       |                              |                        |                              |
| 18-59                                    | 257 (84.5%)              | 106 (90.6%)                   | 135 (90.6%)            | 57 (91.9%)                   | 93 (83.0%)            | 37 (88.1%)                   | 29 (67.4%)             | 12 (92.3%)                   |
| 60-75                                    | 47 (15.5%)               | 11 (9.4%)                     | 14 (9.4%)              | 5 (8.1%)                     | 19 (17.0%)            | 5 (11.9%)                    | 14 (32.6%)             | 1 (7.7%)                     |
| <b>Sex, N (%)</b>                        |                          |                               |                        |                              |                       |                              |                        |                              |
| Female                                   | 176 (57.9%)              | 72 (61.5%)                    | 95 (63.8%)             | 39 (62.9%)                   | 57 (50.9%)            | 25 (59.5%)                   | 24 (55.8%)             | 8 (61.5%)                    |
| Male                                     | 128 (42.1%)              | 45 (38.5%)                    | 54 (36.2%)             | 23 (37.1%)                   | 55 (49.1%)            | 17 (40.5%)                   | 19 (44.2%)             | 5 (38.5%)                    |
| <b>Race/ethnicity,<sup>2</sup> N (%)</b> |                          |                               |                        |                              |                       |                              |                        |                              |
| White                                    | 294 (96.7%)              | 114 (97.4%)                   | 142 (95.3%)            | 61 (98.4%)                   | 109 (97.3%)           | 40 (95.2%)                   | 43 (100.0%)            | 13 (100.0%)                  |
| Asian                                    | 5 (1.6%)                 | 0 (0.0%)                      | 4 (2.7%)               | 0 (0.0%)                     | 1 (0.9%)              | 0 (0.0%)                     | 0 (0.0%)               | 0 (0.0%)                     |
| Black                                    | 2 (0.7%)                 | 2 (1.7%)                      | 0 (0.0%)               | 0 (0.0%)                     | 2 (1.8%)              | 2 (4.8%)                     | 0 (0.0%)               | 0 (0.0%)                     |
| Latino American                          | 3 (1.0%)                 | 1 (0.9%)                      | 3 (2.0%)               | 1 (1.6%)                     | 0 (0.0%)              | 0 (0.0%)                     | 0 (0.0%)               | 0 (0.0%)                     |
| <b>Educational attainment, N (%)</b>     |                          |                               |                        |                              |                       |                              |                        |                              |
| Less than high school                    | 14 (4.6%)                | 3 (2.6%)                      | 4 (2.7%)               | 2 (3.2%)                     | 9 (8.0%)              | 0 (0.0%)                     | 1 (2.3%)               | 1 (7.7%)                     |
| High school                              | 79 (26.0%)               | 27 (23.1%)                    | 42 (28.2%)             | 14 (22.6%)                   | 23 (20.5%)            | 7 (16.7%)                    | 14 (32.6%)             | 6 (46.2%)                    |
| Professional certificate                 | 41 (13.5%)               | 13 (11.1%)                    | 19 (12.8%)             | 6 (9.7%)                     | 16 (14.3%)            | 6 (14.3%)                    | 6 (14.0%)              | 1 (7.7%)                     |
| CEGEP and college certificate            | 101 (33.2%)              | 45 (38.5%)                    | 51 (34.2%)             | 26 (41.9%)                   | 35 (31.3%)            | 14 (33.3%)                   | 15 (34.9%)             | 5 (38.5%)                    |
| University baccalaureate                 | 54 (17.8%)               | 22 (18.8%)                    | 28 (18.8%)             | 12 (19.4%)                   | 21 (18.8%)            | 10 (23.8%)                   | 5 (11.6%)              | 0 (0.0%)                     |
| Graduate studies                         | 15 (4.9%)                | 7 (6.0%)                      | 5 (3.4%)               | 2 (3.2%)                     | 8 (7.1%)              | 5 (11.9%)                    | 2 (4.7%)               | 0 (0.0%)                     |

425 Abbreviations: CEGEP = General and professional teaching college

426 Notes:

427 1. Subset of participants who contracted COVID-19 at least once during the study period.

428 2. Self-reported by study participants

429 **Table 3. Household characteristics of the participants at the first visit**

|                                 | Overall study population |                               | Restaurant/bar workers |                              | Grocery store workers |                              | Hardware store workers |                              |
|---------------------------------|--------------------------|-------------------------------|------------------------|------------------------------|-----------------------|------------------------------|------------------------|------------------------------|
|                                 | Total (N=304)            | COVID-19 <sup>1</sup> (N=117) | Total (N=149)          | COVID-19 <sup>1</sup> (N=62) | Total (N=112)         | COVID-19 <sup>1</sup> (N=42) | Total (N=43)           | COVID-19 <sup>1</sup> (N=13) |
| <b>Region, N (%)</b>            |                          |                               |                        |                              |                       |                              |                        |                              |
| Capitale-Nationale              | 231 (76,0%)              | 91 (77,8%)                    | 112 (75,2%)            | 45 (72,6%)                   | 86 (76,8%)            | 35 (83,3%)                   | 33 (76,7%)             | 11 (84,6%)                   |
| Chaudière-Appalaches            | 73 (24,0%)               | 26 (22,2%)                    | 37 (24,8%)             | 17 (27,4%)                   | 26 (23,2%)            | 7 (16,7%)                    | 10 (23,3%)             | 2 (15,4%)                    |
| <b>Household size, N (%)</b>    |                          |                               |                        |                              |                       |                              |                        |                              |
| 1-2 residents                   | 189 (62,2%)              | 76 (65,0%)                    | 100 (67,1%)            | 48 (77,4%)                   | 57 (50,9%)            | 19 (45,2%)                   | 32 (74,4%)             | 9 (69,2%)                    |
| 3-4 residents                   | 93 (30,6%)               | 32 (27,4%)                    | 36 (24,2%)             | 10 (16,1%)                   | 48 (42,9%)            | 19 (45,2%)                   | 9 (20,9%)              | 3 (23,1%)                    |
| ≥5 residents                    | 22 (7,2%)                | 9 (7,7%)                      | 13 (8,7%)              | 4 (6,5%)                     | 7 (6,3%)              | 4 (9,5%)                     | 2 (4,7%)               | 1 (7,7%)                     |
| <b>Co-residents, N (%)</b>      |                          |                               |                        |                              |                       |                              |                        |                              |
| Underage (<18)                  | 70 (23,0%)               | 29 (24,8%)                    | 35 (23,5%)             | 12 (19,4%)                   | 29 (25,9%)            | 14 (33,3%)                   | 6 (14,0%)              | 3 (23,1%)                    |
| Healthcare worker               | 47 (15,5%)               | 17 (14,5%)                    | 23 (15,4%)             | 9 (14,5%)                    | 18 (16,1%)            | 5 (11,9%)                    | 6 (14,0%)              | 3 (23,1%)                    |
| Kindergarden worker             | 10 (3,3%)                | 3 (2,6%)                      | 5 (3,4%)               | 1 (1,6%)                     | 5 (4,5%)              | 2 (4,8%)                     | 0 (0,0%)               | 0 (0,0%)                     |
| Teacher                         | 13 (4,3%)                | 7 (6,0%)                      | 9 (6,0%)               | 4 (6,5%)                     | 4 (3,6%)              | 3 (7,1%)                     | 0 (0,0%)               | 0 (0,0%)                     |
| <b>Household bedroom, N (%)</b> |                          |                               |                        |                              |                       |                              |                        |                              |
| 0-2                             | 158 (52,0%)              | 66 (56,4%)                    | 90 (60,4%)             | 41 (66,1%)                   | 49 (43,8%)            | 19 (45,2%)                   | 19 (44,2%)             | 6 (46,2%)                    |
| ≥3                              | 146 (48,0%)              | 51 (43,6%)                    | 59 (39,6%)             | 21 (33,9%)                   | 63 (56,3%)            | 23 (54,8%)                   | 24 (55,8%)             | 7 (53,8%)                    |

430 Notes:

431 1. Subset of participants who contracted COVID-19 had least once during the study period.

432

433

434 **Table 4. Clinical characteristics of study participants at the first visit**

|                                         | Overall study population |                               | Restaurant/bar workers |                              | Grocery store workers |                              | Hardware store workers |                              |
|-----------------------------------------|--------------------------|-------------------------------|------------------------|------------------------------|-----------------------|------------------------------|------------------------|------------------------------|
|                                         | Total (N=304)            | COVID-19 <sup>1</sup> (N=117) | Total (N=149)          | COVID-19 <sup>1</sup> (N=62) | Total (N=112)         | COVID-19 <sup>1</sup> (N=42) | Total (N=43)           | COVID-19 <sup>1</sup> (N=13) |
| <b>BMI scores, Mean±SD</b>              | 27,3 ± 6,1               | 27,5 ± 6,4                    | 27,0 ± 6,9             | 26,83 ± 6,7                  | 28,1 ± 5,3            | 27,94 ± 5,2                  | 26,3 ± 5,3             | 27,51 ± 6,6                  |
| BMI categories, N (%)                   |                          |                               |                        |                              |                       |                              |                        |                              |
| <18.5 (underweight)                     | 4 (1,3%)                 | 1 (0,9%)                      | 2 (1,3%)               | 1 (1,6%)                     | 2 (1,8%)              | 0 (0,0%)                     | 0 (0,0%)               | 0 (0,0%)                     |
| 18.5-24.9 (healthy weight)              | 125 (41,1%)              | 49 (41,9%)                    | 73 (49,0%)             | 30 (48,4%)                   | 29 (25,9%)            | 13 (31,0%)                   | 23 (53,5%)             | 6 (46,2%)                    |
| 25.0-29.9 (overweight)                  | 82 (27,0%)               | 23 (19,7%)                    | 31 (20,8%)             | 10 (16,1%)                   | 39 (34,8%)            | 9 (21,4%)                    | 12 (27,9%)             | 4 (30,8%)                    |
| ≥30 (obesity)                           | 93 (30,6%)               | 44 (37,6%)                    | 43 (28,9%)             | 21 (33,9%)                   | 42 (37,5%)            | 20 (47,6%)                   | 8 (18,6%)              | 3 (23,1%)                    |
| <b>Smoking, N (%)</b>                   |                          |                               |                        |                              |                       |                              |                        |                              |
| Cigarette user                          | 53 (17,4%)               | 22 (18,8%)                    | 33 (22,1%)             | 14 (22,6%)                   | 16 (14,3%)            | 6 (14,3%)                    | 4 (9,3%)               | 2 (15,4%)                    |
| E-cigarette user                        | 24 (7,9%)                | 8 (6,8%)                      | 20 (13,4%)             | 6 (9,7%)                     | 3 (2,7%)              | 2 (4,8%)                     | 1 (2,3%)               | 0 (0,0%)                     |
| <b>Comorbidities,<sup>2</sup> N (%)</b> |                          |                               |                        |                              |                       |                              |                        |                              |
| Hypertension                            | 39 (12,8%)               | 11 (9,4%)                     | 13 (8,7%)              | 4 (6,5%)                     | 18 (16,1%)            | 6 (14,3%)                    | 8 (18,6%)              | 1 (7,7%)                     |
| Chronic pulmonary disease               | 33 (10,9%)               | 17 (14,5%)                    | 13 (8,7%)              | 6 (9,7%)                     | 14 (12,5%)            | 10 (23,8%)                   | 6 (14,0%)              | 1 (7,7%)                     |
| Diabetes mellitus                       | 18 (5,9%)                | 5 (4,3%)                      | 4 (2,7%)               | 1 (1,6%)                     | 11 (9,8%)             | 3 (7,1%)                     | 3 (7,0%)               | 1 (7,7%)                     |
| Hypothyroidism                          | 16 (5,3%)                | 4 (3,4%)                      | 6 (4,0%)               | 2 (3,2%)                     | 6 (5,4%)              | 1 (2,4%)                     | 5 (11,6%)              | 1 (7,7%)                     |
| Cancer                                  | 10 (3,3%)                | 3 (2,6%)                      | 4 (2,7%)               | 1 (1,6%)                     | 5 (4,5%)              | 2 (4,8%)                     | 1 (2,3%)               | 0 (0,0%)                     |
| Cardiovascular disease                  | 8 (2,6%)                 | 2 (1,7%)                      | 2 (1,3%)               | 0 (0,0%)                     | 3 (2,7%)              | 1 (2,4%)                     | 3 (7,0%)               | 1 (7,7%)                     |
| Immune deficiency                       | 7 (2,3%)                 | 5 (4,3%)                      | 3 (2,0%)               | 3 (4,8%)                     | 1 (0,9%)              | 0 (0,0%)                     | 3 (7,0%)               | 2 (15,4%)                    |
| Chronic neurological disorder           | 6 (2,0%)                 | 1 (0,9%)                      | 2 (1,3%)               | 1 (1,6%)                     | 3 (2,7%)              | 0 (0,0%)                     | 1 (2,3%)               | 0 (0,0%)                     |
| Liver disease                           | 2 (0,7%)                 | 0 (0,0%)                      | 0 (0,0%)               | 0 (0,0%)                     | 1 (0,9%)              | 0 (0,0%)                     | 1 (2,3%)               | 0 (0,0%)                     |
| Blood disorder                          | 1 (0,3%)                 | 1 (0,9%)                      | 1 (0,7%)               | 1 (1,6%)                     | 0 (0,0%)              | 0 (0,0%)                     | 0 (0,0%)               | 0 (0,0%)                     |
| Obesity <sup>3</sup>                    | 1 (0%)                   | 0 (0%)                        | 1 (1%)                 | 0 (0%)                       | 0 (0%)                | 0 (0%)                       | 0 (0%)                 | 0 (0%)                       |
| Kidney disease                          | 0 (0,0%)                 | 0 (0,0%)                      | 0 (0,0%)               | 0 (0,0%)                     | 0 (0,0%)              | 0 (0,0%)                     | 0 (0,0%)               | 0 (0,0%)                     |
| <b>Influenza vaccination, N (%)</b>     |                          |                               |                        |                              |                       |                              |                        |                              |
| Usually received                        | 52 (17,1%)               | 21 (17,9%)                    | 23 (15,4%)             | 12 (19,4%)                   | 18 (16,1%)            | 7 (16,7%)                    | 11 (25,6%)             | 2 (15,4%)                    |
| Received in the last year               | 42 (13,8%)               | 12 (10,3%)                    | 17 (11,4%)             | 5 (8,1%)                     | 15 (13,4%)            | 5 (11,9%)                    | 10 (23,3%)             | 2 (15,4%)                    |

435 Notes:

436 1. Subset of participants who contracted COVID-19 had least once during the study period.



- 437 2. Comorbidities related to an increased risk of hospitalisation at the first visit.
- 438 3. 30.6% of participants had a BMI in the range of obesity, but only one reported to be obese.

439 **Table 5. Occupational and behavioral characteristic of study participants**

|                                                      | Overall study population |                               | Restaurant/bar workers |                              | Grocery store workers |                              | Hardware store workers |                              |
|------------------------------------------------------|--------------------------|-------------------------------|------------------------|------------------------------|-----------------------|------------------------------|------------------------|------------------------------|
|                                                      | Total (N=304)            | COVID-19 <sup>1</sup> (N=117) | Total (N=149)          | COVID-19 <sup>1</sup> (N=62) | Total (N=112)         | COVID-19 <sup>1</sup> (N=42) | Total (N=43)           | COVID-19 <sup>1</sup> (N=13) |
| <b>Workplace region,<sup>2</sup> N (%)</b>           |                          |                               |                        |                              |                       |                              |                        |                              |
| Capitale-Nationale                                   | 240 (78,9%)              | 96 (82,1%)                    | 123 (82,6%)            | 49 (79,0%)                   | 85 (75,9%)            | 36 (85,7%)                   | 32 (74,4%)             | 11 (84,6%)                   |
| Chaudière-Appalaches                                 | 64 (21,1%)               | 19 (16,2%)                    | 26 (17,4%)             | 12 (19,4%)                   | 27 (24,1%)            | 6 (14,3%)                    | 11 (25,6%)             | 1 (7,7%)                     |
| <b>Weekly hours worked,<sup>3</sup> Mean±SD</b>      | 27,9 ± 11,5              | 28,9 ± 11,4                   | 24,7 ± 11,0            | 24,5 ± 11,0                  | 32,6 ± 10,4           | 34,2 ± 9,8                   | 26,6 ± 11,9            | 32,3 ± 10,4                  |
| Participants working                                 |                          |                               |                        |                              |                       |                              |                        |                              |
| Full time (≥30)                                      | 141 (46,4%)              | 64 (54,7%)                    | 49 (32,9%)             | 23 (37,1%)                   | 73 (65,2%)            | 32 (76,2%)                   | 19 (44,2%)             | 9 (69,2%)                    |
| Part time (<30)                                      | 163 (53,6%)              | 53 (45,3%)                    | 100 (67,1%)            | 39 (62,9%)                   | 39 (34,8%)            | 10 (23,8%)                   | 24 (55,8%)             | 4 (30,8%)                    |
| <b>Gathering of 10+ persons,<sup>3</sup> Mean±SD</b> | 17,1 ± 27,5              | 22,5 ± 31,4                   | 23,2 ± 33,9            | 31,5 ± 38,9                  | 10,4 ± 15,8           | 13,1 ± 15,9                  | 13,7 ± 22,1            | 9,9 ± 10,4                   |
| Per group, N (%)                                     |                          |                               |                        |                              |                       |                              |                        |                              |
| None                                                 | 34 (11,2%)               | 6 (5,1%)                      | 16 (10,7%)             | 2 (3,2%)                     | 15 (13,4%)            | 4 (9,5%)                     | 3 (7,0%)               | 0 (0,0%)                     |
| 1 to 10 gatherings                                   | 146 (48,0%)              | 47 (40,2%)                    | 57 (38,3%)             | 16 (25,8%)                   | 62 (55,4%)            | 22 (52,4%)                   | 27 (62,8%)             | 9 (69,2%)                    |
| 11 to 50 gatherings                                  | 101 (33,2%)              | 51 (43,6%)                    | 58 (38,9%)             | 33 (53,2%)                   | 32 (28,6%)            | 14 (33,3%)                   | 11 (25,6%)             | 4 (30,8%)                    |
| >50 gatherings                                       | 23 (7,6%)                | 13 (11,1%)                    | 18 (12,1%)             | 11 (17,7%)                   | 3 (2,7%)              | 2 (4,8%)                     | 2 (4,7%)               | 0 (0,0%)                     |
| <b>Transportation,<sup>2</sup> N (%)</b>             |                          |                               |                        |                              |                       |                              |                        |                              |
| Car                                                  | 266 (87,5%)              | 103 (88,0%)                   | 127 (85,2%)            | 54 (87,1%)                   | 98 (87,5%)            | 37 (88,1%)                   | 41 (95,3%)             | 12 (92,3%)                   |
| Carpooling                                           | 2 (0,7%)                 | 2 (1,7%)                      | 1 (0,7%)               | 1 (1,6%)                     | 1 (0,9%)              | 1 (2,4%)                     | 0 (0,0%)               | 0 (0,0%)                     |
| Bus                                                  | 39 (12,8%)               | 16 (13,7%)                    | 23 (15,4%)             | 9 (14,5%)                    | 10 (8,9%)             | 5 (11,9%)                    | 6 (14,0%)              | 2 (15,4%)                    |
| Bicycle                                              | 13 (4,3%)                | 6 (5,1%)                      | 7 (4,7%)               | 3 (4,8%)                     | 4 (3,6%)              | 2 (4,8%)                     | 2 (4,7%)               | 1 (7,7%)                     |
| Walking                                              | 28 (9,2%)                | 11 (9,4%)                     | 13 (8,7%)              | 6 (9,7%)                     | 14 (12,5%)            | 5 (11,9%)                    | 1 (2,3%)               | 0 (0,0%)                     |
| <b>Travel,<sup>3</sup> N (%)</b>                     |                          |                               |                        |                              |                       |                              |                        |                              |
| Any destination                                      | 143 (47,0%)              | 70 (59,8%)                    | 79 (53,0%)             | 40 (64,5%)                   | 48 (42,9%)            | 25 (59,5%)                   | 16 (37,2%)             | 5 (38,5%)                    |
| In Canada                                            | 78 (25,7%)               | 39 (33,3%)                    | 45 (30,2%)             | 24 (38,7%)                   | 23 (20,5%)            | 13 (31,0%)                   | 10 (23,3%)             | 2 (15,4%)                    |
| To USA                                               | 45 (14,8%)               | 20 (17,1%)                    | 25 (16,8%)             | 11 (17,7%)                   | 16 (14,3%)            | 8 (19,0%)                    | 4 (9,3%)               | 1 (7,7%)                     |
| Other destination <sup>4</sup>                       | 84 (27,6%)               | 45 (38,5%)                    | 47 (31,5%)             | 25 (40,3%)                   | 28 (25,0%)            | 16 (38,1%)                   | 9 (20,9%)              | 4 (30,8%)                    |

440 Notes:

441 1. Subset of participants who contracted COVID-19 had least once during the study period.

442 2. At the time of the first visit (i.e., week 0).

443 3. During the entire study period.

444 4. Includes travel to Cuba, Ireland, Great-Britain, Luxembourg, Dominican Republic, South Africa, Bahamas, Morocco, Guadeloupe,

445 Panama, Costa Rica, Greece.

446

447 **Table 6. Protective measures taken at work and elsewhere by study participants at first visit**

|                                                          | Overall study population |                               | Restaurant/bar workers |                              | Grocery store workers |                              | Hardware store workers |                              |
|----------------------------------------------------------|--------------------------|-------------------------------|------------------------|------------------------------|-----------------------|------------------------------|------------------------|------------------------------|
|                                                          | Total (N=304)            | COVID-19 <sup>1</sup> (N=117) | Total (N=149)          | COVID-19 <sup>1</sup> (N=62) | Total (N=112)         | COVID-19 <sup>1</sup> (N=42) | Total (N=43)           | COVID-19 <sup>1</sup> (N=13) |
| <b>Protection measures at work,<sup>2</sup> N (%)</b>    |                          |                               |                        |                              |                       |                              |                        |                              |
| Mask                                                     | 300 (98,7%)              | 116 (99,1%)                   | 147 (98,7%)            | 61 (98,4%)                   | 111 (99,1%)           | 42 (100,0%)                  | 41 (95,3%)             | 13 (100,0%)                  |
| Handwashing                                              | 299 (98,4%)              | 114 (97,4%)                   | 145 (97,3%)            | 59 (95,2%)                   | 111 (99,1%)           | 42 (100,0%)                  | 43 (100,0%)            | 13 (100,0%)                  |
| Plexiglas                                                | 235 (77,3%)              | 88 (75,2%)                    | 96 (64,4%)             | 39 (62,9%)                   | 98 (87,5%)            | 37 (88,1%)                   | 41 (95,3%)             | 12 (92,3%)                   |
| Social distancing                                        | 213 (70,1%)              | 86 (73,5%)                    | 111 (74,5%)            | 48 (77,4%)                   | 74 (66,1%)            | 29 (69,0%)                   | 28 (65,1%)             | 9 (69,2%)                    |
| Protective glasses                                       | 77 (25,3%)               | 12 (10,3%)                    | 30 (20,1%)             | 4 (6,5%)                     | 35 (31,3%)            | 5 (11,9%)                    | 12 (27,9%)             | 3 (23,1%)                    |
| Faceshield                                               | 32 (10,5%)               | 4 (3,4%)                      | 16 (10,7%)             | 1 (1,6%)                     | 13 (11,6%)            | 2 (4,8%)                     | 3 (7,0%)               | 1 (7,7%)                     |
| Gloves                                                   | 21 (6,9%)                | 3 (2,6%)                      | 10 (6,7%)              | 0 (0,0%)                     | 9 (8,0%)              | 3 (7,1%)                     | 2 (4,7%)               | 0 (0,0%)                     |
| Face Cover                                               | 7 (2,3%)                 | 1 (0,9%)                      | 3 (2,0%)               | 0 (0,0%)                     | 4 (3,6%)              | 1 (2,4%)                     | 0 -                    | 0 (0,0%)                     |
| Other <sup>3</sup>                                       | 135 (44,4%)              | 59 (50,4%)                    | 85 (57,0%)             | 41 (66,1%)                   | 43 (38,4%)            | 16 (38,1%)                   | 7 (16,3%)              | 2 (15,4%)                    |
| <b>Behavioral protection measures,<sup>2</sup> N (%)</b> |                          |                               |                        |                              |                       |                              |                        |                              |
| Mask wearing in public spaces                            | 304 (100,0%)             | 117 (100,0%)                  | 149 (100,0%)           | 62 (100,0%)                  | 112 (100,0%)          | 42 (100,0%)                  | 43 (100,0%)            | 12 (92,3%)                   |
| Avoid usual salutations                                  | 259 (85,2%)              | 99 (84,6%)                    | 119 (79,9%)            | 48 (77,4%)                   | 103 (92,0%)           | 39 (92,9%)                   | 37 (86,0%)             | 12 (92,3%)                   |
| Social distancing                                        | 256 (84,2%)              | 93 (79,5%)                    | 115 (77,2%)            | 41 (66,1%)                   | 102 (91,1%)           | 40 (95,2%)                   | 39 (90,7%)             | 12 (92,3%)                   |
| Avoid contacts with vulnerable persons                   | 254 (83,6%)              | 93 (79,5%)                    | 114 (76,5%)            | 42 (67,7%)                   | 100 (89,3%)           | 38 (90,5%)                   | 40 (93,0%)             | 13 (100,0%)                  |
| Avoid crowded places                                     | 233 (76,6%)              | 81 (69,2%)                    | 102 (68,5%)            | 35 (56,5%)                   | 94 (83,9%)            | 34 (81,0%)                   | 37 (86,0%)             | 12 (92,3%)                   |
| Quarantine if exposed to COVID-19                        | 126 (41,4%)              | 70 (59,8%)                    | 65 (43,6%)             | 36 (58,1%)                   | 46 (41,1%)            | 25 (59,5%)                   | 15 (34,9%)             | 9 (69,2%)                    |
| Pre-emptive isolation                                    | 36 (11,8%)               | 23 (19,7%)                    | 21 (14,1%)             | 13 (21,0%)                   | 12 (10,7%)            | 9 (21,4%)                    | 3 (7,0%)               | 1 (7,7%)                     |
| <b>Handwashing habits,<sup>2</sup> N (%)</b>             |                          |                               |                        |                              |                       |                              |                        |                              |
| After using the toilet                                   | 297 (97,7%)              | 115 (98,3%)                   | 147 (98,7%)            | 60 (96,8%)                   | 109 (97,3%)           | 42 (100,0%)                  | 41 (95,3%)             | 13 (100,0%)                  |
| When dirty                                               | 294 (96,7%)              | 113 (96,6%)                   | 140 (94,0%)            | 58 (93,5%)                   | 112 (100,0%)          | 42 (100,0%)                  | 42 (97,7%)             | 13 (100,0%)                  |
| When entering workspace                                  | 280 (92,1%)              | 106 (90,6%)                   | 136 (91,3%)            | 55 (88,7%)                   | 107 (95,5%)           | 37 (88,1%)                   | 37 (86,0%)             | 13 (100,0%)                  |
| Before eating                                            | 267 (87,8%)              | 104 (88,9%)                   | 124 (83,2%)            | 51 (82,3%)                   | 105 (93,8%)           | 41 (97,6%)                   | 38 (88,4%)             | 12 (92,3%)                   |
| Before & after handling food                             | 246 (80,9%)              | 96 (82,1%)                    | 127 (85,2%)            | 55 (88,7%)                   | 93 (83,0%)            | 32 (76,2%)                   | 26 (60,5%)             | 9 (69,2%)                    |
| After handling trash                                     | 242 (79,6%)              | 97 (82,9%)                    | 119 (79,9%)            | 51 (82,3%)                   | 95 (84,8%)            | 38 (90,5%)                   | 28 (65,1%)             | 8 (61,5%)                    |
| When exiting workspace                                   | 218 (71,7%)              | 81 (69,2%)                    | 104 (69,8%)            | 41 (66,1%)                   | 87 (77,7%)            | 32 (76,2%)                   | 27 (62,8%)             | 8 (61,5%)                    |
| Other <sup>4</sup>                                       | 50 (16,4%)               | 11 (9,4%)                     | 29 (19,5%)             | 4 (6,5%)                     | 12 (10,7%)            | 2 (4,8%)                     | 9 (20,9%)              | 5 (38,5%)                    |

448 Notes:

449 1. Subset of participants who contracted COVID-19 had least once during the study period

- 450 2. Includes customer registry, QR code, customer limit in store, thorough cleaning of workplace, worker temperature surveillance.
- 451 3. Includes after touching the cash register, handling money, in between clients.

452 **Table 7. Number of COVID-19 positive tests**

|                                                   | <b>Overall cohort</b> | <b>Bar/<br/>Restaurant</b> | <b>Grocery store</b> | <b>Hardware store</b> |
|---------------------------------------------------|-----------------------|----------------------------|----------------------|-----------------------|
| <b>Reported positive COVID-19 tests</b>           |                       |                            |                      |                       |
| First occurrence                                  | <b>117</b>            | <b>62</b>                  | <b>42</b>            | <b>13</b>             |
| PCR                                               | 40                    | 24                         | 13                   | 3                     |
| Antigen detection                                 | 77                    | 38                         | 29                   | 10                    |
| Additional test <sup>1</sup>                      | <b>8</b>              | <b>5</b>                   | <b>2</b>             | <b>1</b>              |
| PCR                                               | 1                     | 1                          | 0                    | 0                     |
| Antigen detection                                 | 7                     | 4                          | 2                    | 1                     |
| <b>Positive PCR test for COVID-19 at V4 or V5</b> | <b>11</b>             | <b>6</b>                   | <b>5</b>             | <b>0</b>              |
| First occurrence                                  | 4                     | 1                          | 3                    | 0                     |
| Additional test                                   |                       |                            |                      |                       |
| <90 days from previous test                       | 4                     | 3                          | 1                    | 0                     |
| ≥90 days from previous test                       | 3                     | 2                          | 1                    | 0                     |
| <b>Reported symptoms (no positive test)</b>       | <b>31</b>             | <b>17</b>                  | <b>12</b>            | <b>2</b>              |

453 Notes:

454 1. All 90 days or more since a previously positive test.

455

456 **Table 8. COVID-19 symptoms at the first COVID-19 positive test reported by the participant**

|                                      | <b>Overall cohort<br/>(N=117)</b> | <b>Bar/<br/>Restaurant<br/>(N=62)</b> | <b>Grocery<br/>store<br/>(N=42)</b> | <b>Hardware<br/>store<br/>(N=13)</b> |
|--------------------------------------|-----------------------------------|---------------------------------------|-------------------------------------|--------------------------------------|
| <b>Asymptomatic infection, N (%)</b> | <b>6 (5,1%)</b>                   | <b>2 (3,2%)</b>                       | <b>4 (9,5%)</b>                     | <b>0 (0,0%)</b>                      |
| <b>Symptomatic infection, N (%)</b>  | <b>111 (94,9%)</b>                | <b>60 (96,8%)</b>                     | <b>38 (90,5%)</b>                   | <b>13 (100,0%)</b>                   |
| Runny nose or nasal congestion       | 76 (65,0%)                        | 39 (62,9%)                            | 26 (61,9%)                          | 11 (84,6%)                           |
| Cough                                | 74 (63,2%)                        | 41 (66,1%)                            | 25 (59,5%)                          | 8 (61,5%)                            |
| Headache                             | 71 (60,7%)                        | 36 (58,1%)                            | 26 (61,9%)                          | 9 (69,2%)                            |
| Sore throat                          | 70 (59,8%)                        | 41 (66,1%)                            | 23 (54,8%)                          | 6 (46,2%)                            |
| Fever                                | 68 (58,1%)                        | 39 (62,9%)                            | 19 (45,2%)                          | 9 (69,2%)                            |
| Muscle pain                          | 65 (55,6%)                        | 35 (56,5%)                            | 22 (52,4%)                          | 8 (61,5%)                            |
| Shortness of breath                  | 56 (47,9%)                        | 27 (43,5%)                            | 21 (50,0%)                          | 8 (61,5%)                            |
| Loss of sense of smell or taste      | 26 (22,2%)                        | 11 (17,7%)                            | 10 (23,8%)                          | 5 (38,5%)                            |
| Diarrhea                             | 16 (13,7%)                        | 7 (11,3%)                             | 8 (19,0%)                           | 1 (7,7%)                             |

457

458 **Table 9. COVID-19 vaccination status at the first reported COVID-19 positive test**

|                                  | <b>Overall cohort<br/>(N=117)</b> | <b>Bar/<br/>Restaurant<br/>(N=62)</b> | <b>Grocery<br/>store<br/>(N=42)</b> | <b>Hardware<br/>store<br/>(N=13)</b> |
|----------------------------------|-----------------------------------|---------------------------------------|-------------------------------------|--------------------------------------|
| <b>Vaccination status, N (%)</b> |                                   |                                       |                                     |                                      |
| No vaccine                       | 21 (17.9%)                        | 11 (17.7%)                            | 10 (23.8%)                          | 0 (0.0%)                             |
| One dose                         | 1 (0.9%)                          | 0 (0.0%)                              | 1 (2.4%)                            | 0 (0.0%)                             |
| Two doses                        | 45 (38.5%)                        | 24 (38.7%)                            | 15 (35.7%)                          | 6 (46.2%)                            |
| Three doses                      | 46 (39.3%)                        | 26 (41.9%)                            | 14 (33.3%)                          | 6 (46.2%)                            |
| Four doses                       | 4 (3.4%)                          | 1 (1.6%)                              | 2 (4.8%)                            | 1 (7.7%)                             |

459



460 **Table 10. Blood samples collected by vaccination status**

|                          | Overall cohort<br>Blood samples (N = 1299) |                    |
|--------------------------|--------------------------------------------|--------------------|
|                          | Infected                                   | Not infected       |
| <b>No Vaccine, N (%)</b> | <b>11 (0.8%)</b>                           | <b>89 (6.9%)</b>   |
| <b>Vaccinated, N (%)</b> | <b>300 (23.1%)</b>                         | <b>899 (69.2%)</b> |
| 1 dose                   | 14 (1.1%)                                  | 61 (4.7%)          |
| 2 doses                  | 145 (11.2%)                                | 584 (45.0%)        |
| 3 doses                  | 122 (9.4%)                                 | 231 (17.8%)        |
| 4 doses                  | 20 (1.5%)                                  | 22 (1.7%)          |

461

**Figure 1. Timeline of the study illustrating the visits (colored dash lines) and the first occurrences of COVID-**

**19-positive tests (grey bars)**

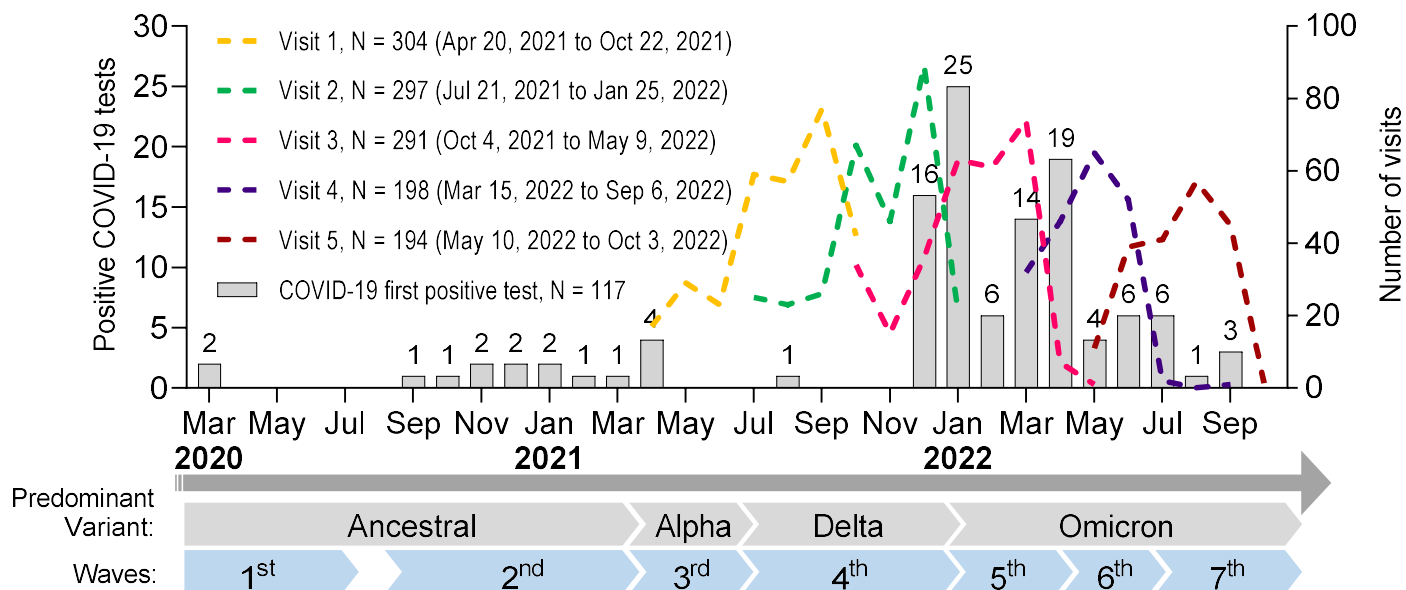

**Figure 2. Evolution of the vaccination coverage (Comirnaty [Pfizer-BioNTech], SpikeVax [Moderna] or Vaxzevria [AstraZeneca] vaccine) during the study period (A) in the overall cohort stratified by the number of doses received, and (B) stratified by occupational group. The study data are compared to those of the Public Health Agency of Canada (Qc population) for the whole province.<sup>20</sup>**

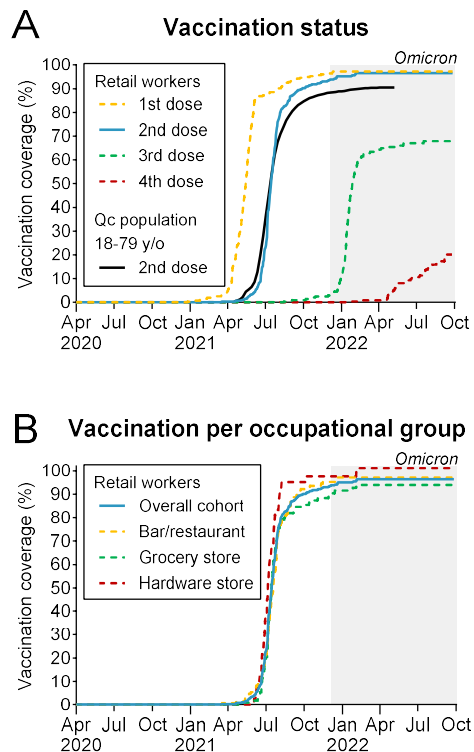

Source: http://medrxiv.org/content/10.1101/2023.08.18.23294172v1.full.pdf
